# Supplementary material for: Transcriptome Analysis of the Central and Peripheral Nervous Systems of the Spider Cupiennius salei Reveals Multiple Putative Cys-Loop Ligand Gated Ion Channel Subunits and an Acetylcholine Binding Protein
Source: PubMed Central journal article supplement (PMC4569296; doi:10.1371/journal.pone.0138068), 2015-09-14

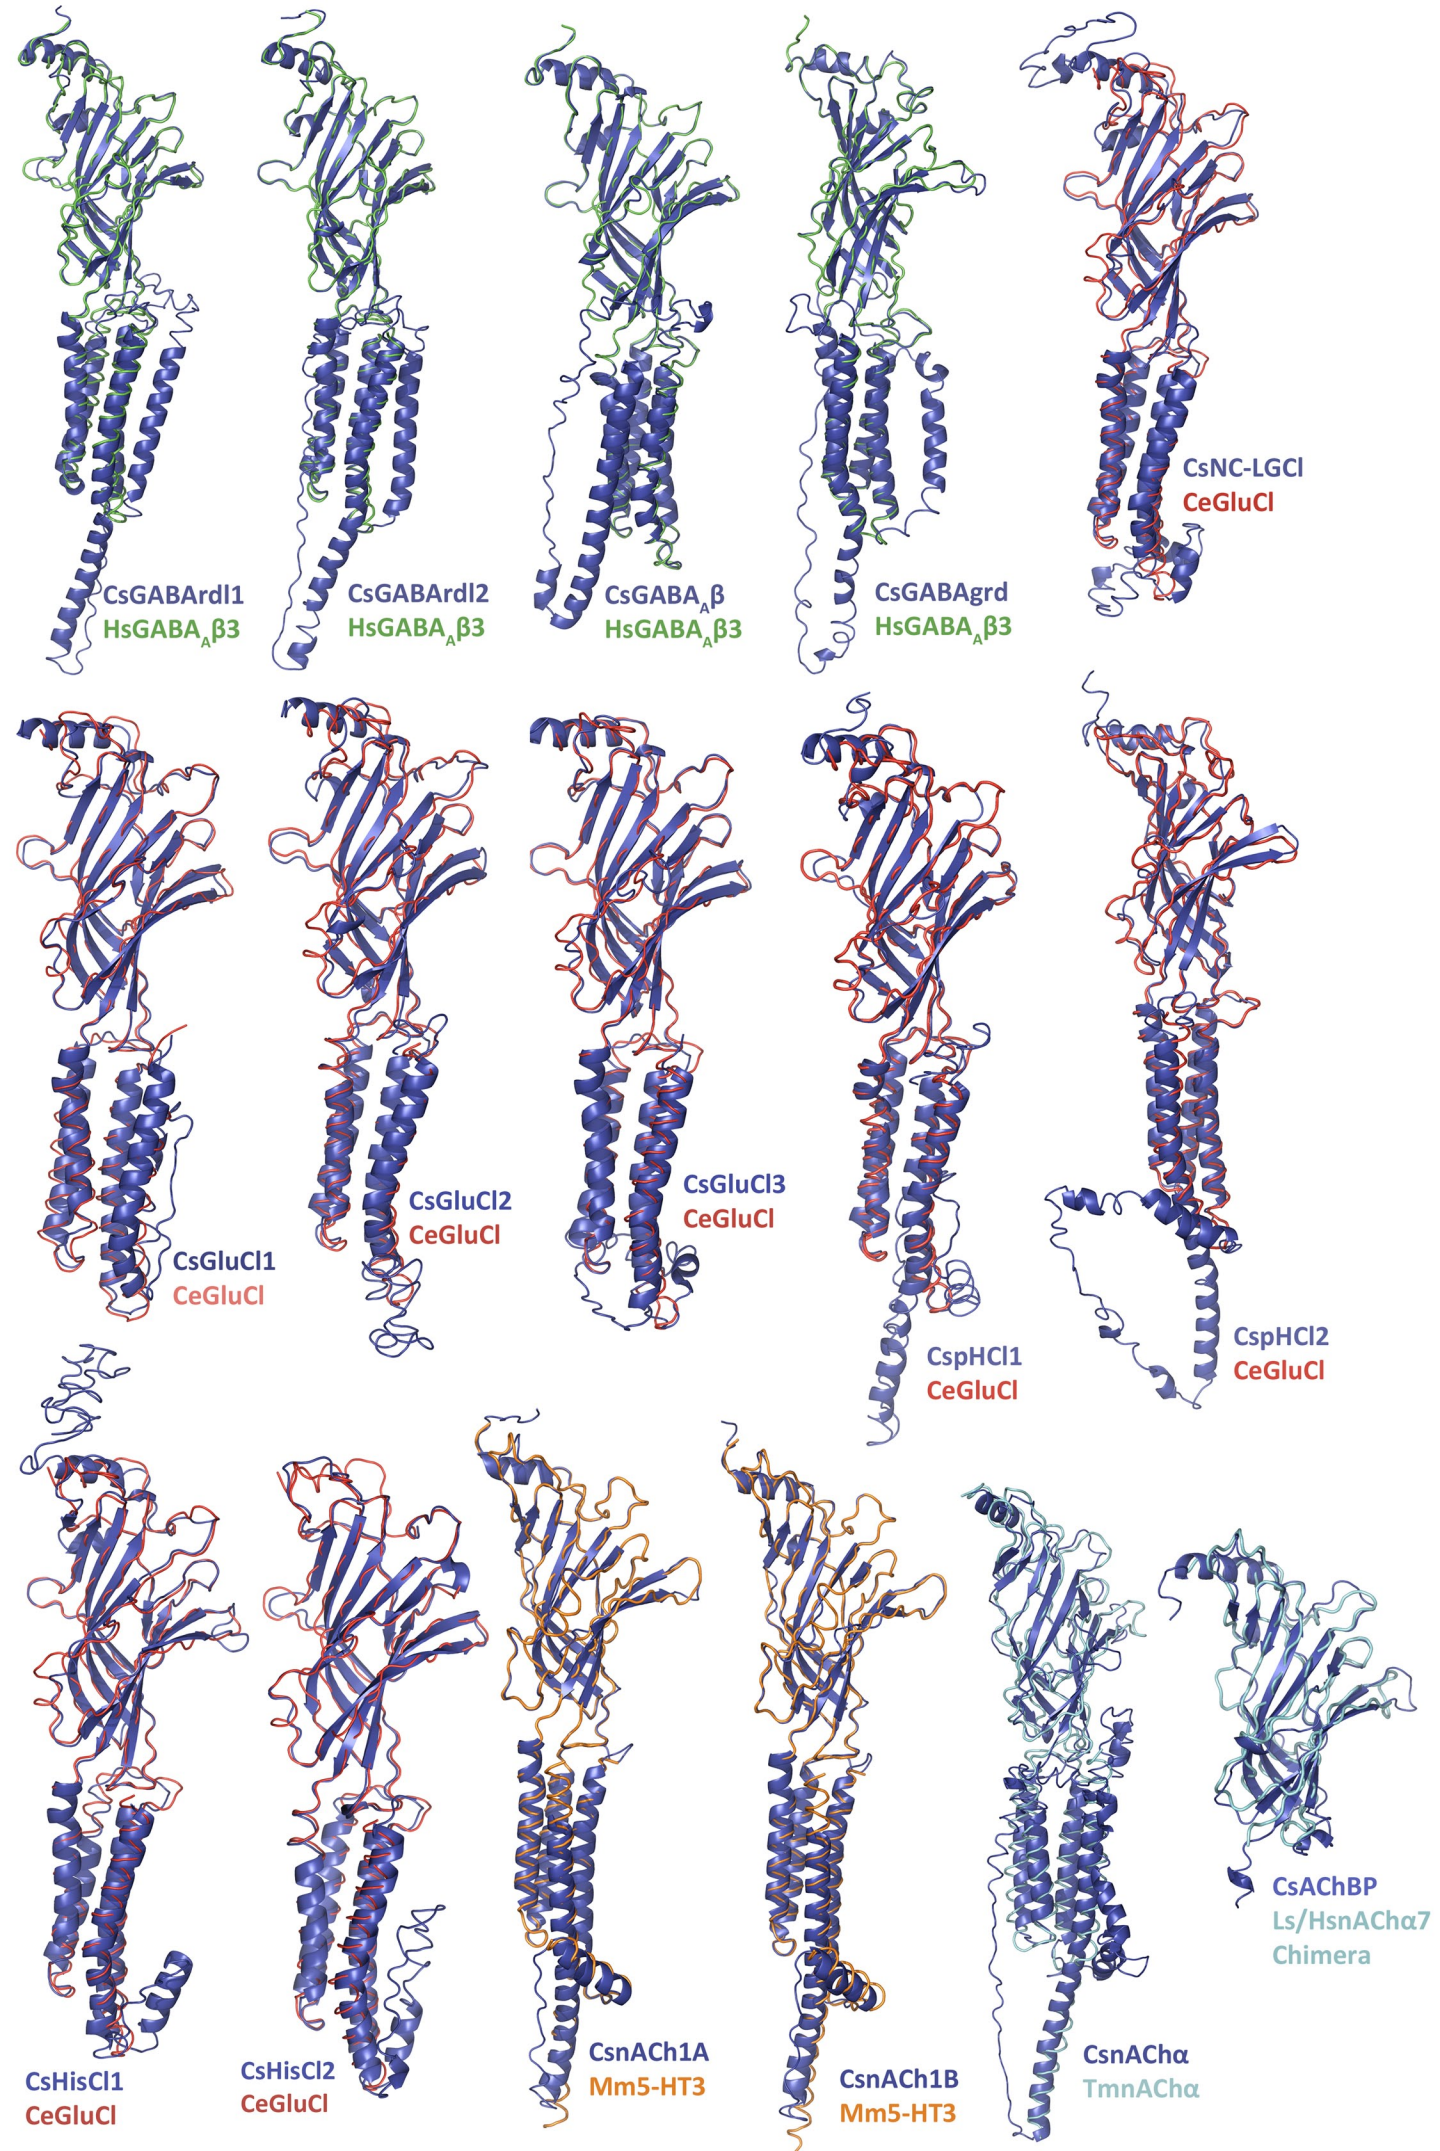

Supplement: pone.0138068.s003.pdf [file pone.0138068.s003.pdf]
