# Supplementary material for: Transcriptome Analysis of the Central and Peripheral Nervous Systems of the Spider Cupiennius salei Reveals Multiple Putative Cys-Loop Ligand Gated Ion Channel Subunits and an Acetylcholine Binding Protein
Source: PubMed Central journal article supplement (PMC4569296; doi:10.1371/journal.pone.0138068), 2015-09-14
Supplement: pone.0138068.s004.pdf [file pone.0138068.s004.pdf]

S1 Table: List of genes used for analysis

| Phylum/class         | Species                        | Protein                   | Uniprot / NCBI code | PDB |
|----------------------|--------------------------------|---------------------------|---------------------|-----|
| Arthropoda/insecta   | <i>Acyrtosiphon pisum</i>      | NC (comp)                 | J9JTU7              |     |
|                      | <i>Aedes aegypti</i>           | GABAr1 (comp) Ho          | Q16896              |     |
|                      | <i>Anopheles gambiae</i>       | nAChR $\alpha$ 9 (comp)   | Q7PSA8              |     |
|                      | <i>Apis mellifera</i>          | pHCl (comp)               | A0A088AFF8          |     |
|                      |                                | GABAlcch3 (comp)          | A0A088A2R0          |     |
|                      |                                | GABAgrd (comp)            | A0A087ZPX8          |     |
|                      | <i>Bombyx mori</i>             | GluCl3b (comp)            | V9P9S1              |     |
|                      |                                | GABAgrd (comp)            | E0X9H5              |     |
|                      | <i>Culex quinquefasciatus</i>  | nAChR $\alpha$ 4 (comp)   | B0W5Q9              |     |
|                      | <i>Drosophila melanogaster</i> | nACh $\alpha$ 1 (comp) He | P09478              |     |
|                      |                                | nACh $\beta$ 1 (comp) He  | P04755              |     |
|                      |                                | GluCl $\alpha$ (comp) Ho  | Q94900              |     |
|                      |                                | pHClA (frag) Ho           | Q5D6W1              |     |
|                      |                                | HisCl1 (comp) Ho          | Q9VGI0              |     |
|                      |                                | HisCl2 (comp) (ort)       | A1KYB3              |     |
|                      |                                | Ho                        |                     |     |
|                      |                                | GABAr1 (comp)             | P25123              |     |
|                      |                                | Ho/He                     |                     |     |
|                      |                                | GABAlcch3 (comp)          | Q08832              |     |
|                      |                                | He                        |                     |     |
|                      | GABAgrd (comp) He              | Q24352                    |                     |     |
|                      | <i>Locusta migratoria</i>      | nACh $\alpha$ 8 (comp)    | W6EAG0              |     |
|                      | <i>Microplitis demolitor</i>   | nACh $\alpha$ 1 (comp)    | XP_008553229        |     |
|                      |                                | nACh $\alpha$ 2 (comp)    | XP_008549166        |     |
|                      |                                | nACh $\alpha$ 7 (comp)    | XP_008560787        |     |
|                      | <i>Musca domestica</i>         | GABAr1 (comp) Ho          | Q75NA5              |     |
|                      | <i>Nasonia vitripennis</i>     | nACh $\alpha$ 11 (comp)   | D3UA23              |     |
|                      |                                | GluCl (comp)              | D3UAF9              |     |
|                      |                                | pHCl (comp)               | D3UAF2              |     |
|                      |                                | HisCl1 (comp)             | D3UAF0              |     |
|                      |                                | GABAlcch3 (comp)          | D3UAF7              |     |
|                      | <i>Tribolium castaneum</i>     | nACh $\alpha$ 10 (comp)   | A8DIV1              |     |
|                      |                                | pHCl (comp)               | A8DMU9              |     |
| HisCl1 (comp)        |                                | A8DMU7                    |                     |     |
| HisCl2 (comp)        |                                | A8DMU8                    |                     |     |
| GABAlcch3 (comp)     |                                | A8DMU3                    |                     |     |
| GABAgrd (comp)       |                                | A8DMU2                    |                     |     |
| Arthropoda/arachnida | <i>Dermacentor variabilis</i>  | GluCl10-2 Ho              | US patent 7267964   |     |
|                      |                                | GluCl1-GluCl11 Ho         | US patent EP2009021 |     |
|                      | <i>Ixodes ricinus</i>          | nACh1 (comp)              | V5H4U2              |     |
|                      |                                | nACh2 (frag)              | V5HYY9              |     |
|                      | <i>Ixodes scapularis</i>       | nACh $\alpha$ 1 (frag)    | A0A088BD75          |     |
|                      |                                | GluCl1 (frag)             | R9S2C9              |     |
|                      |                                | GluCl2 (frag)             | R9S0M9              |     |
|                      |                                | GluCl3 (frag)             | B7Q8K2              |     |
|                      |                                | Gly $\alpha$ 1 (frag)     | B7P8W0              |     |
|                      |                                | HisCl (frag)              | R9S1B2              |     |
|                      | GABA $\alpha$ (comp)           | B7PLP1                    |                     |     |

| Phylum/class                   | Species                         | Protein                             | Uniprot / NCBI code | PDB  |
|--------------------------------|---------------------------------|-------------------------------------|---------------------|------|
|                                |                                 | GABA <sub>A</sub> 1 (comp)          | B7Q4M3              |      |
|                                |                                 | GABA <sub>A</sub> 2 (frag)          | R9S1A7              |      |
|                                |                                 | GABA <sub>A</sub> 3 (frag)          | B7Q4M8              |      |
|                                | <i>Metaseiulus occidentalis</i> | nACh $\alpha$ 1A (comp)             | XP_003745665        |      |
|                                |                                 | nACh $\alpha$ 1B (comp)             | XP_003738108        |      |
|                                |                                 | nACh $\alpha$ 1C (comp)             | XP_003738107        |      |
|                                |                                 | Gly $\alpha$ 2 (comp)               | XP_003748161        |      |
|                                |                                 | GABA <sub>A</sub> $\alpha$ (comp)   | XP_003747426        |      |
|                                |                                 | GABA <sub>A</sub> $\beta$ (comp)    | XP_003747411        |      |
|                                | <i>Pardosa pseudoannulata</i>   | nACh $\alpha$ 1 (comp) He           | D6QYZ4              |      |
|                                |                                 | nACh $\alpha$ 8 (comp) He           | D6QYZ5              |      |
|                                |                                 | nACh $\beta$ 1 (comp) He            | C7EA46              |      |
|                                | <i>Rhipicephalus microplus</i>  | GABA <sub>A</sub> (comp)            | C8CGT5              |      |
|                                | <i>Rhipicephalus pulchellus</i> | nACh (frag)                         | L7MKP0              |      |
|                                |                                 | GABA <sub>A</sub> (comp)            | L7LVP4              |      |
|                                |                                 | Gly $\alpha$ 3 (comp)               | L7M4K6              |      |
|                                | <i>Rhipicephalus sanguineus</i> | nACh $\alpha$ 1 (comp) He           | V9Z9T0              |      |
|                                | <i>Sarcoptes scabiei</i>        | pHCl (frag) Ho                      | A8SDR1              |      |
|                                | <i>Stegodyphus mimosarum</i>    | nACh $\alpha$ 2 (frag)              | A0A087UEE3          |      |
|                                |                                 | nACh $\alpha$ 7 (frag)              | A0A087U1S9          |      |
|                                |                                 | nACh $\alpha$ 10 (frag)             | A0A087U0W4          |      |
|                                |                                 | nACh $\beta$ 3 (frag)               | A0A087TJD1          |      |
|                                |                                 | GABA <sub>A</sub> $\alpha$ (frag)   | A0A087TN57          |      |
|                                |                                 | GABA <sub>A</sub> $\beta$ 1 (frag)  | A0A087TN58          |      |
|                                |                                 | GABA <sub>A</sub> $\beta$ 2 (frag)  | A0A087TN61          |      |
|                                |                                 | GluCl1 (frag)                       | A0A087TG26          |      |
|                                |                                 | GluCl2 (frag)                       | A0A087UMK3          |      |
|                                |                                 | GluCl3 (frag)                       | A0A087UMK5          |      |
|                                |                                 | GluCl4 (frag)                       | A0A087UMK6          |      |
|                                |                                 | Gly $\alpha$ Z1 (frag)              | A0A087UNJ7          |      |
|                                |                                 | Gly $\alpha$ Z2 (frag)              | A0A087UNJ8          |      |
|                                | <i>Tetranychus urticae</i>      | nACh $\alpha$ 3 (comp)              | T1JSJ8              |      |
|                                |                                 | nACh $\alpha$ 7 (comp)              | T1KYX4              |      |
|                                |                                 | nACh $\beta$ 1 (comp)               | T1KCW6              |      |
|                                |                                 | GluCl1 (frag)                       | H9U2V4              |      |
|                                |                                 | HisCl1 (comp)                       | T1KWX0              |      |
|                                |                                 | pHCl (comp)                         | T1K9D2              |      |
|                                |                                 | GABAr12 (comp)                      | T1L3N8              |      |
| <b>Arthropoda/Chilopoda</b>    | <i>Strigamia maritima</i>       | NC2 (comp)                          | T1JOD0              |      |
| <b>Arthropoda/crustacea</b>    | <i>Daphnia pulex</i>            | NC1 (comp)                          | E9HDH4              |      |
|                                |                                 | NC2 (comp)                          | E9H343              |      |
| <b>Nematoda/Chromadorea</b>    | <i>Caenorhabditis elegans</i>   | nACh $\beta$ 3 (comp) He            | Q93149              |      |
|                                |                                 | GluCl $\alpha$ (comp)               | G5EBR3              | 3rhw |
|                                |                                 | Ho/He/B                             |                     | 4tnw |
| <b>Annelida</b>                | <i>Capitella teleta</i>         | AChBP (comp) B                      | I6L8L2              |      |
| <b>Mollusca/gastropoda</b>     | <i>Lymnaea stagnalis</i>        | GABA <sub>A</sub> $\beta$ (comp) He | P26714              |      |
|                                |                                 | AChBP (com) B                       | P58154              | 1i9B |
|                                | <i>Sepia officinalis</i>        | GABA <sub>A</sub> $\beta$ (comp)    | Q9GYU4              |      |
| <b>Chordata/elasmobranchii</b> | <i>Torpedo marmorata</i>        | nACh $\alpha$ (comp) B              | P02711              | 2bg9 |

| Phylum/class      | Species             | Protein                       | Uniprot / NCBI code | PDB  |
|-------------------|---------------------|-------------------------------|---------------------|------|
| Chordata/mammalia | <i>Homo sapiens</i> | nACh $\alpha$ 7 (comp) Ho     | P36544              |      |
|                   |                     | nACh $\alpha$ 9 (comp) He     | Q9UGM1              | 4do1 |
|                   |                     | nACh $\beta$ 3 (comp) No      | Q05901              |      |
|                   |                     | GABA $_A$ $\alpha$ 2 (comp)   | P47869              |      |
|                   |                     | GABA $_A$ $\beta$ 3 (comp) Ho | P28472              | 4cof |
|                   |                     | Gly $\alpha$ 1 (comp) Ho      | P23415              |      |
|                   |                     | Gly $\alpha$ 2 (comp) Ho      | P23416              |      |
|                   | <i>Mus Musculus</i> | 5HT $_3$ A Ho                 | P23979              | 4Pir |

NC = uncharacterized, “comp” indicates complete genes and “frag” gene fragments. NCBI codes are shown in italics for sequences where Uniprot codes are not available. PDB; protein data bank code.

Ho = formed homomultimeric channels in expression systems, He= heteromultimeric channels in expression system, B= ligand binding tested. lcch3 = ligand gated chloride ion channel homolog 3. rdl = resistance to dieldrin. grd = GABA and glycine-like receptor.
