# Supplementary material for: Transcriptome Analysis of the Central and Peripheral Nervous Systems of the Spider Cupiennius salei Reveals Multiple Putative Cys-Loop Ligand Gated Ion Channel Subunits and an Acetylcholine Binding Protein
Source: PLoS One. 2015 Sep 14;10(9):e0138068. doi: 10.1371/journal.pone.0138068 (PMC4569296; doi:10.1371/journal.pone.0138068)
Supplement: S2 Fig — Signal peptides for all C. salei sequences are shown in red. Secondary structure as predicted by I-Tasser for CsnAChα protein shows β-sheets in green and α-helices in red. I-Tasser confidence score was over 8 for these predictions. Amino acid sequences that form agonist-binding loops A to F are indicated as blue lines. Cys-loop and the double cysteine are shown in brown. TM1-TM4 are the transmembrane segments. Gray color indicates conserved amino acids based on Jalview consensus threshold of 50% where darker gray means higher conservation. Accession numbers for C. salei sequences are in Table 1 and for the other species in S1 Table. (PDF) [file pone.0138068.s002.pdf]

Loop D

C.salei\_AchBP 1 MG V L S V L S L L A I S A F A L L S L V N G D V Y K S E R L R R D I F R D Y D K L V R P V R R P T S I S V K I S L S P L S R S M N E K R I T L E S W I M M T T E Y Q W N P S E Y D N I T E L 103  
L.stagnalis\_AchBP 1 M R R N I F C L A C L W I V Q A C I L S D R A D I L Y N R Q T S R P D V I T Q T R R P V A S V S K F I N I L E N I T E V D V V F W Q T T S R T A W N S S I H S P D Q V 93  
S.mimosarum\_nAcho2 1 S Y T A V R V W A F L L L S C V T V N A G L I A D F D G Y K S E R L R K Y L F D E D K L V R P V M I P S N K I N V S A G I T P L S I R E D E T N Q L I V L D S W I K M M N D E Y K M D P S F E G N V T V L 106  
S.mimosarum\_nAcho7 1 M Q Y V L Q L C I M F S E I L L I L I N V M M I L A T D E N E Y R L N K Y L S N Y D K S V R P A R H A S E P V N V T F G I A L T Q I I D V D E R N Q I L T T N C W L N Q I M M Y G L N H S D F G S I K V V 106  
C.salei\_nAcho 1 H A K T H Y G G C R F R M Y W I L F A L T S D G N P A R R L Y D D I S R Y N K L V R P V M N V D T P L T V H I K L S Q L I E N L N K Q I M T T N L W E Y Y H H Y G L N P R E Y G G V D M L 105  
P.pseudoannulata\_nAcho8 1 M R R W P T L V L L V C C W W C F C A G N P O A K R L Y D D L M S S Y N R L I R P S V S N S D T L T V M G M K L S Q L I D N L N K Q I M T T N V W N Q E S H K K M D P D E Y G G V Q Q L 98  
L.iricinus\_nAcho2 1 L I L L D A K R L Y D D I S R Y N K L V R P V M N V D T P L T V H I K L S Q L I E N L N K Q I M T T N L W E Y Y H H Y G L N P R E Y G G V D M L 76  
L.scapularis\_nAcho1 1 L I L L D A K R L Y D D L M S S Y N R L I R P S V S N S D T L T V M G M K L S Q L I D N L N K Q I M T T N V W N Q E S H K K M D P Q E Y G G V T L 79  
D.melanogaster\_nAcho1 1 M G S L V L F A A V F I L H F A T G G L N P A K R L Y D D L S N Y R L I R P V G N S D T L T V M G M K L S Q L I D N L N K Q I M T T N V W E Q E N N Y K K M D P D Y G G V D T L 99  
M.demolitor\_nAcho 1 M M K L V L G I M W I L V L V L I S G C G N P A K R L Y D D L S N Y R L I R P V M N V D T L T V H I K L S Q L I D N L N K Q I M T T N L W E Y Y H H Y G L N P R E Y G G V M L 99  
T.marmorata\_nAcho 1 M I L C Y W M G V L V L L F L F S C C G L V G S E H T R L A N L E N N K V I R P V E H T H F V D I T Q L Q L I N D V E N Q I V E T N V R L R Q Q I D V R R W N P A D Y G G I K K I 102  
H.sapiens\_nAcho7 1 M R C S P G G V W L A L A A S L V S L G E F Q R K L Y E L V M N Y P L E R P V A N S Q P L T V F S I S L L Q I M D E K N Q V L T I N I W L Q S W I T H Y Q W N V S E Y P G V K T 100  
C.salei\_nAcho1A 1 M N I Q L R V G F F F V L V P I L V I N V C A T D P K L S E T M K M T V D R I L N G D K A V P T R E G S N T E V T R G I I P K I L D D E E K G I F V L D S Y F W M V M E P R R N N Q S T E Y D G Y L 110  
C.salei\_nAcho1B 1 M N I Q L R V G F F F V L V P I L V I N V C A T D P K L S E T M K M T V D R I L N G D K A V P T R E G S N T E V T R G I I P K I L D D E E K G I F A L D S Y F W M V M E P R R N N Q S T E Y D G Y L 110  
S.mimosarum\_nAcho3 1 M F C I R L A L S Y G L I L V S G G I C L V T A T A E I D T A S R I L K D K S L S Y F V S V R H Y T I S H V R V R G D E V K G E L I L E A P I V L A N T D R T W E S D T V R S L 109  
P.pseudoannulata\_nAcho1 1 M E T S C L I L Y S V L I M A T F A I S C L V G W C S D E E R L R D F G N K L I R P Q N M T E K V D R F G L A F Q L I N N E K N Q I M K S N V M L Q L M N Y Q W D E A D Y G G I S V L 101  
D.melanogaster\_nAcho1 1 M E T S C K S W L L S L V L V A F S L V S A E D E F R V D L F R G N K L I R P Q N M T E K V D R F G L A F Q L I N N E K N Q I M K S N V M L Q L M N Y Q W D E A D Y G G I S V L 101  
C.quinquefasciatus\_nAcho4 1 M R F E L F S T V F V S Y L V L G C A A E D V Q P G T M T W A D K L K D L F V N Y D R T N R P T Q H Y N V T N M V K V G M S V R H I D D E V S S I F T V S N W I N M E T R E K L R N N P E D Y G D L K I I 103

Loop A Loop E Loop B Loop F

C.salei\_AchBP 104 H I P T E I W K D I A L Y T S F T D S S F F P V V R T D A I V Y N S G M V L V W P P F T I N S R C P I P E R N Y V S V R T F V E C N I R M G S W T Y S G M V D L Q L S T D K V D L T N F Q D Y N H E M K 207  
L.stagnalis\_AchBP 94 V S P I S S L V L D A A Y N A I S K P E V L T P Q L A R V S D G E V L M V P I R Q R F S C D V S I G V D T E S G A C R I K I G S W T H S R I E S V O P T T E N S D D S E Y F Q S Y S R E 191  
S.mimosarum\_nAcho2 107 R V P S T E V R P D S I Y T A V P E N I F P R L S Q L I Y N D G T F V W P P V T I K S R C P L F N R A K N A I K N I R M G S W T Y S G M V D V L S S P E V D S Y F I D N N A E M K 206  
S.mimosarum\_nAcho7 107 R I P A D K W R P D I L Y N N A D G Q N N A I S T N V I S D G N L T W S S A I F R S S C K I N V A W F P F D E Q N G S M F A S V S Y D G F R V N V I Q T K E G D L S N Y E N G E M D 206  
C.salei\_nAcho 106 H V P S D H I W R D I V L Y N N A D G N F E V T L E A Q L N N R G I Q K W P A I Y K S S C E I D V E F F P F D V Q T C L M F G S W T Y D G F K V D L R H D E V K G T N L V E V G I D L T E F Y L S V E M D 213  
P.pseudoannulata\_nAcho8 99 V P T E Q I W L P D I V L Y N N A D G N Y E V T I M T K A T V Y Y T G E I V M K P A I Y K S T C E I D V E F F P F D E Q T C L M F G S W T Y D G F E V D L R H V K Q E G G T N L V P I G I D M S E F Y K S V E M D 206  
L.iricinus\_nAcho1 77 H V P S D Y I W R D I V L Y N N A D G N F E V T I S T K A Q L N Y T R I Q K W P A I Y K S T C E I D V E F F P F D E Q T C L M F G S W T Y D G F K V D L R H V D E V P N Q S L V E I G D L T E F Y L S V E M D 184  
L.scapularis\_nAcho1 80 V P A E Q I W R D I V L Y N N A D G N Y E V T I M T K A I I H E D S R V N N P A I Y K S S C Q I D V Q Y F P F D K Q D C M F G S W T Y D G F K V D L R H D E V K G E L I L E A P I V L A N T D R T W E S D T V R S L 109  
D.melanogaster\_nAcho1 100 H V P S E H I W R D I V L Y N N A D G N Y E V T I M T K A I L H T G C V M K W P A I Y K S S C E I D V E F F P F D E Q T C M F G S W T Y D G F V M V D L R H L K Q T A D S N D I E V G I D L Q D Y I S V E M D 207  
M.demolitor\_nAcho2 100 H V P S D H I W R D I V L Y N N A D G N F E V T I L A T K A T I N Y T R G V D M K W P A I Y K S S C E I D V E F F P F D E Q T C M F G S W T Y D G F Q V D L R H I D E V G N N V D I G V D L S E F Y T S V E M D 207  
T.marmorata\_nAcho 103 R L P S D D V W L P D I V L Y N N A D G D F A I V H M T K L L D Y T G K I M W T P A I F K S Y C E I I V T H F P F D Q Q N G T M K L G I W T Y D G T K V S I S P E S D R P D L S T F M E S G E V M T 201  
H.sapiens\_nAcho7 101 R F P D G Q I W K P D I L L Y N S A D E R F A T F H T N V N S S G C H Q L P P G I F K S S C E I I D V R W F P F D V Q H C K L F K G S W S Y G S W D L S M Q E A I D S G Y I P N G E V M L 197  
C.salei\_nAcho1A 111 Q L P A D L W I P D I S V H N S H S L Q V N P T Q Q V M L L I P P T G I V W P P I L T K T S P S I S Q A T Y P N D V T C I L V M G S W S V H D G W E I D F T H E E H L M D E F I N V H S R I W 210  
C.salei\_nAcho1B 111 Q L P A D L W I P D I S V H N S H S L Q V N P T Q Q V M L L I P P T G I V W P P I L T K T S P S I S Q A T Y P N D V T C I L V M G S W S V H D G W E I D F T H E E H L M D E F I N V H S R I W 210  
S.mimosarum\_nAcho3 110 R I P S D N I W P S I N I L R N I E P N E V T N D P L P V L P G G C V H V P A I Y K S T C I P N L K Y Y P F D V Q T Q D V I L S V S Y G E D L L Q T N S M P V L I N N A A L T R I V E L N H W 212  
P.pseudoannulata\_nAcho1 102 R L P D K V K W R D I V L F N N A D G N Y E V R Y S N V L Y P G G C V H V P A I Y K S T C I D T V T Y F P F D Q Q T C M F G S W T F N G D Q V S L K L Y D N Y W D L S D Y K S G T D 202  
D.melanogaster\_nAcho1 103 R L P D K V K W R D I V L F N N A D G N Y E V R Y S N V L Y P G G C V H V P A I Y K S T C I D T V T Y F P F D Q Q T C M F G S W T F N G D Q V S L K L Y D N Y W D L S D Y K S G T D 203  
C.quinquefasciatus\_nAcho4 104 R T A S E I W K D I L L Y N A K S T N I D H F G L D V L I Y N D K I L W P P D T F T F C R L N L R L W P F D Q Q T C M F G S W S V H D A L S I N L T L T K P G D V D T D D E S E V M T 203

Loop C TM1 Cys-loop TM2 TM3

C.salei\_AchBP 208 L V I K I V N S R E S K L V P C D V E Y P F V D E N V T L K R N Y Y L N D N P E D S G L D P V E L G I T T L L S V T F L M V I G E S M P P T S D T V 246  
L.stagnalis\_AchBP 192 I L D V T Q K K S V T Y S C C P E A Y E D E V S I N F R K K R S E I P E D S G L D P V E L G I T T L L S V T F L M V I G E S M P P T S D T V 228  
S.mimosarum\_nAcho2 207 L M E A R A S R E S K L V P C K E A Y P L L H N V T L K R N P S E N E L I P E D S G L D P V E L G I T T L L S V T F L M V I G E S M P P T S D T V 260  
S.mimosarum\_nAcho7 207 L I T M L V E R N E Y V Y S C C Q E P Y P D V T F H I V L R K T F L V Y N L I P C M L I T G I A L L S Y M P S D S G E K V T L G I T T L L S V T F L M V I G E S M P P T S D T V 299  
C.salei\_nAcho 214 I L E V P A V R H E K Y Y T C C E P Y P D I T E N I T M R K T L F Y T V N L I P C M G I S F I T V L V Y L P S D S G E K V T L S I S L L S T V F L L L A E I I P P T S L V P L L G K Y L L F T M I L V T L S I C V T 327  
P.pseudoannulata\_nAcho8 207 I L L V P A K V M E L I D C C S E P Y P D I T E N I T M R K T L F Y T V N L I P C M G I S F I T V L V Y L P S D S G E K V T L S I S L L S T V F L L L A E I I P P T S L V P L L G K Y L L F T M I L V T L S I C V T 327  
L.iricinus\_nAcho2 185 I L E V P A V R H E K Y Y T C C Q E P Y P D I T E N I T M R K T L F Y T V N L I P C M G I S F I T V L V Y L P S D S G E K V A L S I S L L S T V F L L L A E I I P P A S L V P L L G K Y L L F T M I L V T L S I C V T 298  
L.scapularis\_nAcho1 188 I M A V P A M R R E K F Y Y T C C Q E P Y P D I T E N I T R K T L F Y T V N L I P C M G I S F I T V L V Y L P S D S G E K V S L S I S L L S T V F L L L A E I I P P T S L A M P L L G K Y L V T F M I L V T S V L V T 301  
D.melanogaster\_nAcho1 208 I M A V P A V R N E K F Y Y T C C E P Y P D I T E N I T L R K T L F Y T V N L I P C M G I S F I T V L V Y L P S D S G E K I S L C I S I S L L S T V F L L L A E I I P P T S L V P L L G K Y L L F T M I L V T S V V T 321  
M.demolitor\_nAcho2 208 I L E V P A V R N E K Y Y T C C D E P Y L D I T E N I T M R K T L F Y T V N L I P C M G I S F I T V L V Y L P S D S G E K V S L S I S L L S T V F L L L A E I I P P T S L V P L L G K Y L L F T M I L D T F S I C V T 321  
T.marmorata\_nAcho 202 M K D Y R G W K H V W Y Y T C C P D T P Y L D I T Y H I F M I P L Y F V N V I I P C L F S F L T V L V Y L P T S D G E K M T S I S L L S T V F L L V I L E I P T S S A V P L I G K Y M L F T M I F V I S I V T 316  
H.sapiens\_nAcho7 198 L V G I P G K R S E F Y E C C K E P Y P D V T F T M R R T L Y Y G L N L I P C V L I S A L L V L L P A D S G E K I S G I T V L L S T V F L L V A E I M P A T S D S V P L I A Q Y F A S T M I V G L S V V V T 311  
C.salei\_nAcho1 211 L L V P A T M I R N V T Y Y E Y P E P Y L S D A I F P L K R P P P E I A T R N P C I L I M L L V I S I F W M P P D S K L M V A C I S F M A L I L L V Y V A W S T R Y S L G V F A V S F L Q S T M I A V A T L L Q 325  
C.salei\_nAcho1B 211 L V P E V R M I R N V T Y Y E Y P E P Y L S D A I F P L K R P P P E I A T R N P C I L I M L L V I S I F W M P P D S K L M I G G I S F M A L I L L V Y V A C T R F S L G V I F A V S F L Q S T M I A V A T L L Q 325  
S.mimosarum\_nAcho3 213 V S A D I V P A V R N E K Y Y T C C E P Y P D I T E N I T M R K T L F Y T V N L I P C M G I S F I T V L V Y L P S D S G E K V T L S I S L L S T V F L L L A E I I P P T S L V P L L G K Y L L F T M I L V T L S I C V T 327  
P.pseudoannulata\_nAcho1 203 V I L E V P A F I N N O S T G P T E T S I I F L N K T L F Y T V L L P T A L I S F I C L E Y L P A E A G E K V T G I S I S L L S V F L L S K I P P T S L V P L I A K Y L L F T M I N T V S I L T 317  
D.melanogaster\_nAcho1 204 I L E V P A Y L N Y E G D S N H P T E T S I I F L N K T L F Y T V N L I P C M G I S F I T V L V Y L P A E A G E K V T G I S I S L L S V F L L S K I P P T S L V P L I A K Y L L F T M I N T V S I L T 317  
C.quinquefasciatus\_nAcho4 204 I Q N I T V R H N T V T Y E C C P E P Y V D V E Y F F T V K R T S C V V V V S P I L I L L L L T S L V E W L P H P C E K I V L N G I V M M I A T A L L I Y F S I Q L P I R Y G N A P L V V I F T I T L F Q T A F G A T L S 316

C.salei\_AchBP 328 V V V L N V H F R T S S T H K M A P W K R V F L Q V L P R L L M R R P L Y S A D P R K F M T R P C N G I E G Q T V P R T S Y E V E F G E Q A P Q S S 403  
L.stagnalis\_AchBP 321 V G L N V H F R S T H M S P W R V R F I I M P R L L M R R P Y A D A S D D E A P P K F T V R G C N G M V R R T P R E D G S V R G C N G M V R R T P R E D G S V I V P P L 397  
S.mimosarum\_nAcho2 327 V V V L N V H F R S S T H M S P W R V R F L Q V L P R L L M R R P V Q D P P K V L V R G C N G T L R D A S S S Q G P R G S F E A A F E E L Q H E P A C K 382  
S.mimosarum\_nAcho7 302 I A V L N V H F R S P T H M A P W R R L F V H I M P R L L M R R P Q Y R I E T D E S A A K P P V R G C N G T L R D A S S S Q G P R G S F E A A F E E L Q H E P A C K 382  
C.salei\_nAcho 322 I A V L N V H F R S P T H M A P W Q R L F I L P K L L I E R P K K E E P E D Q P E V I L D V Y H L P P D V D K F V N Y D S K R F S G D Y G I P A L P A S H R F D L A A A G G I S A H C F A E P P L L V D 431  
D.melanogaster\_nAcho1 322 V V V L N V H F R S P T H M A P W R R V F I H V L P R L L M R R Y D L R P Q Y Q I D R S S Y D Q R V M V R T C N G L E V R D P T L F A E D P G A E F V E P P M L F P S V 411  
M.demolitor\_nAcho2 317 V V I N T H R S P S T H M P Q W R K I F I N T I P N V M F S T M K R A S K E Q N K V R T C N G L E V R D P T L F A E D P G A E F V E P P M L F P S V 411  
T.marmorata\_nAcho 312 V I V L Q Y H H H D P D G G K M P K W T R V I L N W C A W F L R M K R P G E D K V R P A C Q H K Q R R M K R P G E D K V R P A C Q H K Q R R 363  
H.sapiens\_nAcho7 326 L L V I S L N C I S G P V R P P A V M G F L S G P G K Y A L L V H M G G P P L V M G G P P L A K I L E E V R I A N R F Q C D E S A E A V C S E W K F A A C V D R 469  
C.salei\_nAcho1A 326 L V I F I N C I S G P V R P P A V M G F L S G P G K Y A L L V H M G G P P L V M G G P P L A K I L E E V R I A N R F Q C D E S A E A V C S E W K F A A C V D R 469  
C.salei\_nAcho1B 326 V S M L L V I F I N C I S G P V R P P A V M G F L S G P G K Y A L L V H M G G P P L V M G G P P L A K I L E E V R I A N R F Q C D E S A E A V C S E W K F A A C V D R 469  
S.mimosarum\_nAcho3 318 V I L E V P A F I N N O S T G P T E T S I I F L N K T L F Y T V L L P T A L I S F I C L E Y L P A E A G E K V T G I S I S L L S V F L L S K I P P T S L V P L I A K Y L L F T M I N T V S I L T 317  
P.pseudoannulata\_nAcho1 318 V I L E V P A F I N N O S T G P T E T S I I F L N K T L F Y T V L L P T A L I S F I C L E Y L P A E A G E K V T G I S I S L L S V F L L S K I P P T S L V P L I A K Y L L F T M I N T V S I L T 317  
D.melanogaster\_nAcho1 318 V I L E V P A F I N N O S T G P T E T S I I F L N K T L F Y T V L L P T A L I S F I C L E Y L P A E A G E K V T G I S I S L L S V F L L S K I P P T S L V P L I A K Y L L F T M I N T V S I L T 317  
C.quinquefasciatus\_nAcho4 317 A I V I K I C R I K H T R P V P L R R A L L E G R L E S M L V H N A E A S P P P G L T M R L H F C P E Q R A M E S V H I A D H T R R E E H I S V K E D W K Y V A M V L B R 490

TM4

C.salei\_AchBP 490 Q Y G A C R I H G Y T G K A S D P V T I D D D G S S S V H N A E A S P P P G L T M R L H F C P E Q R A M E S V H I A D H T R R E E H I S V K E D W K Y V A M V L B R 490  
L.stagnalis\_AchBP 398 D N L H V G F R P S G A E D V G L E A A V M G N L D N L H V G F R P S G A E D V G L E A A V M G N L D N L H V G F R P S G A E D V G L E A A V M G N L D N L H V G F R P S G A E D V G L E A A V M G N L 472  
S.mimosarum\_nAcho2 383 L H G T L R P P Q R S T R A A D A P E D A A S P G N P P G R P S P P P A P G M R L H F C P D L Q R A E S V H I A D H T R R L H F C P D L Q R A E S V H I A D H T R R 449  
S.mimosarum\_nAcho7 374 L A V N V H F R S P T H M A P W Q R L F I L P K L L I E R P K K E E P E D Q P E V I L D V Y H L P P D V D K F V N Y D S K R F S G D Y G I P A L P A S H R F D L A A A G G I S A H C F A E P P L L V D 431  
C.salei\_nAcho 432 L A V N V H F R S P T H M A P W Q R L F I L P K L L I E R P K K E E P E D Q P E V I L D V Y H L P P D V D K F V N Y D S K R F S G D Y G I P A L P A S H R F D L A A A G G I S A H C F A E P P L L V D 431  
D.melanogaster\_nAcho1 432 L A V N V H F R S P T H M A P W Q R L F I L P K L L I E R P K K E E P E D Q P E V I L D V Y H L P P D V D K F V N Y D S K R F S G D Y G I P A L P A S H R F D L A A A G G I S A H C F A E P P L L V D 431  
M.demolitor\_nAcho2 412 S R D E L N P L E G A D D L F S G P S L N G I S P G C C P A A A A A A L S P T F E K P Y A R E M K T I E G S F R I A Q H V K N K D F S E V D W K Y V A M V L B R 513  
T.marmorata\_nAcho 365 S R D E L N P L E G A D D L F S G P S L N G I S P G C C P A A A A A A L S P T F E K P Y A R E M K T I E G S F R I A Q H V K N K D F S E V D W K Y V A M V L B R 513  
H.sapiens\_nAcho7 364 I F A D D I D I S I S G K Q V T P A S I P P P Q L T E D S V A L C K T L N N W H C P E L Y K A I E A I R F A D H T K R E D S T R V K E D W K Y V A M V L B R 503  
C.salei\_nAcho1A 359 C S L A S V E M S A V A P P S A N G N L L Y I G R F L D G V H C V P T P S D G V S G R M A C S P T H D E I L H G G A P P G E D P L A K I L E E V R I A N R F Q C D E S A E A V C S E W K F A A C V D R 469  
C.salei\_nAcho1B 359 L R P F S S D N I P I D Q M L K E D S P A I T S L R P F S S D N I P I D Q M L K E D S P A I T S L R P F S S D N I P I D Q M L K E D S P A I T S L R P F S S D N I P I D Q M L K E D S P A I T S 401  
S.mimosarum\_nAcho3 357 L R P F S S D N I P I D Q M L K E D S P A I T S L R P F S S D N I P I D Q M L K E D S P A I T S L R P F S S D N I P I D Q M L K E D S P A I T S L R P F S S D N I P I D Q M L K E D S P A I T S 401  
P.pseudoannulata\_nAcho1 390 A S A T C H V V V G A A S G M D Y V E M H D I H P N C T A A A A Q L G G A G G E L R D I E A V D T L L S S E A Y R A T E A E F I A E H L S D D E Y I Q I R E D W K Y V A M V L B R 483  
D.melanogaster\_nAcho1 384 L P K H I S A I G G K S K M E V M S D L H P P N C K I N R K V N S G G E L G D G C R R E S S D L L S P E A S K A E A E F I A E H L R N D E Y I Q I R E D W K Y V A M V L B R 481  
C.quinquefasciatus\_nAcho4 349 G I F A S Y L V M F C I A F V W C V V E L G C T L L P P Y E D K E I E G N Q E I G D V A I R D W C R I A G L D R 387

C.salei\_AchBP 490 Q Y G A C R I H G Y T G K A S D P V T I D D D G S S S V H N A E A S P P P G L T M R L H F C P E Q R A M E S V H I A D H T R R E E H I S V K E D W K Y V A M V L B R 490  
L.stagnalis\_AchBP 398 D N L H V G F R P S G A E D V G L E A A V M G N L D N L H V G F R P S G A E D V G L E A A V M G N L D N L H V G F R P S G A E D V G L E A A V M G N L 472  
S.mimosarum\_nAcho2 383 L H G T L R P P Q R S T R A A D A P E D A A S P G N P P G R P S P P P A P G M R L H F C P D L Q R A E S V H I A D H T R R L H F C P D L Q R A E S V H I A D H T R R 449  
S.mimosarum\_nAcho7 374 L A V N V H F R S P T H M A P W Q R L F I L P K L L I E R P K K E E P E D Q P E V I L D V Y H L P P D V D K F V N Y D S K R F S G D Y G I P A L P A S H R F D L A A A G G I S A H C F A E P P L L V D 431  
C.salei\_nAcho 432 L A V N V H F R S P T H M A P W Q R L F I L P K L L I E R P K K E E P E D Q P E V I L D V Y H L P P D V D K F V N Y D S K R F S G D Y G I P A L P A S H R F D L A A A G G I S A H C F A E P P L L V D 431  
D.melanogaster\_nAcho1 432 L A V N V H F R S P T H M A P W Q R L F I L P K L L I E R P K K E E P E D Q P E V I L D V Y H L P P D V D K F V N Y D S K R F S G D Y G I P A L P A S H R F D L A A A G G I S A H C F A E P P L L V D 431  
M.demolitor\_nAcho2 412 S R D E L N P L E G A D D L F S G P S L N G I S P G C C P A A A A A A L S P T F E K P Y A R E M K T I E G S F R I A Q H V K N K D F S E V D W K Y V A M V L B R 513  
T.marmorata\_nAcho 365 S R D E L N P L E G A D D L F S G P S L N G I S P G C C P A A A A A A L S P T F E K P Y A R E M K T I E G S F R I A Q H V K N K D F S E V D W K Y V A M V L B R 513  
H.sapiens\_nAcho7 364 I F A D D I D I S I S G K Q V T P A S I P P P Q L T E D S V A L C K T L N N W H C P E L Y K A I E A I R F A D H T K R E D S T R V K E D W K Y V A M V L B R 503  
C.salei\_nAcho1A 359 C S L A S V E M S A V A P P S A N G N L L Y I G R F L D G V H C V P T P S D G V S G R M A C S P T H D E I L H G G A P P G E D P L A K I L E E V R I A N R F Q C D E S A E A V C S E W K F A A C V D R 469  
C.salei\_nAcho1B 359 L R P F S S D N I P I D Q M L K E D S P A I T S L R P F S S D N I P I D Q M L K E D S P A I T S L R P F S S D N I P I D Q M L K E D S P A I T S L R P F S S D N I P I D Q M L K E D S P A I T S 401  
S.mimosarum\_nAcho3 357 L R P F S S D N I P I D Q M L K E D S P A I T S L R P F S S D N I P I D Q M L K E D S P A I T S L R P F S S D N I P I D Q M L K E D S P A I T S L R P F S S D N I P I D Q M L K E D S P A I T S 401  
P.pseudoannulata\_nAcho1 390 A S A T C H V V V G A A S G M D Y V E M H D I H P N C T A A A A Q L G G A G G E L R D I E A V D T L L S S E A Y R A T E A E F I A E H L S D D E Y I Q I R E D W K Y V A M V L B R 483  
D.melanogaster\_nAcho1 384 L P K H I S A I G G K S K M E V M S D L H P P N C K I N R K V N S G G E L G D G C R R E S S D L L S P E A S K A E A E F I A E H L R N D E Y I Q I R E D W K Y V A M V L B R 481  
C.quinquefasciatus\_nAcho4 349 G I F A S Y L V M F C I A F V W C V V E L G C T L L P P Y E D K E I E G N Q E I G D V A I R D W C R I A G L D R 387
